# Psychiatric Services

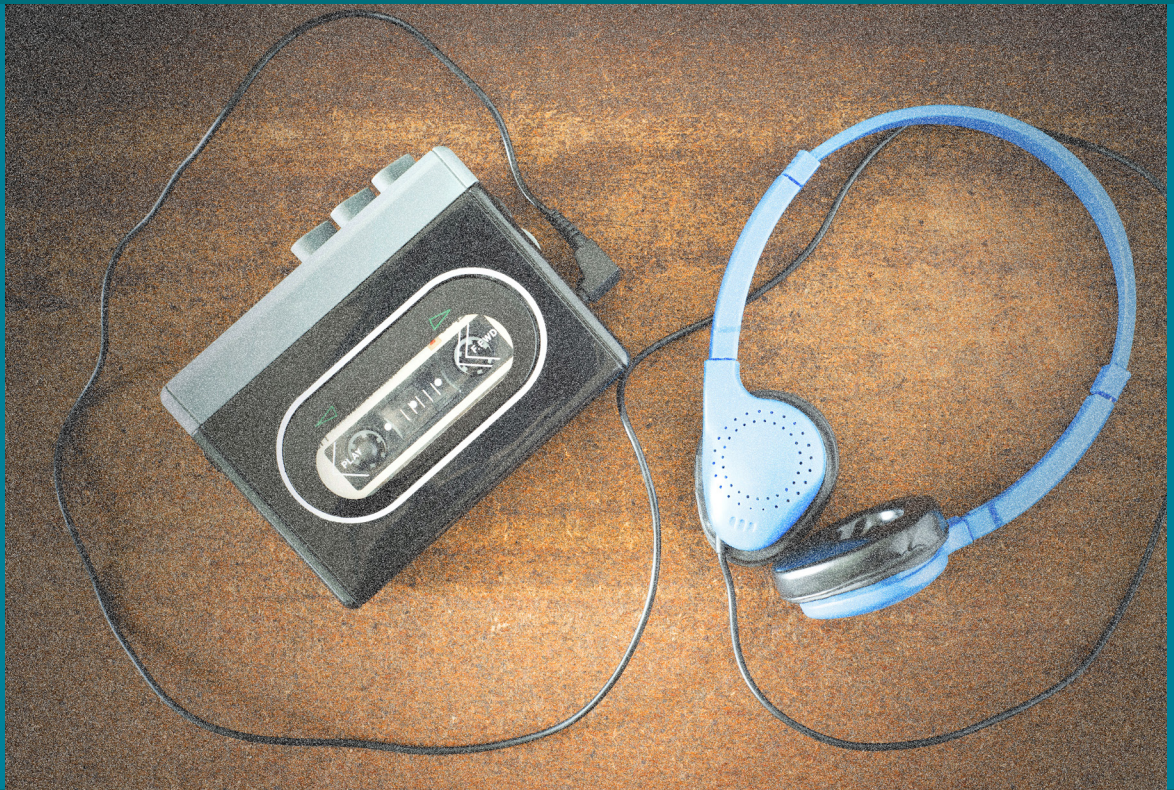

*13 Reasons Why* viewing patterns of youths in crisis

Mortality associated with opioid overdose

Benzodiazepine use and misuse in the United States

Suicide prevention in the Arctic
